# Supplementary material
Source: PubMed Central journal article supplement (PMC4136354)

**Additional file as PDF:**

**Kuang et al. “Impaired Nef function is associated with early control of HIV-1 viremia”**

**Figure S1: Nef sequences examined in this study.** An unrooted maximum likelihood phylogenetic tree illustrates all clonal Nef sequences isolated from 10 AC (red) and 55 AP (blue) participants. In addition, bulk patient Nef sequences (black) and the Nef sequence from HIV-1<sub>SF2</sub> reference strain (grey) are shown. Asterisks (\*) indicate Nef clones selected for functional assessments.

**Figure S2: Range of CD4 and HLA class I downregulation activities in Acute Controllers.**

Scatter plots depict normalized CD4 (**Panel A**) and HLA class I (**Panel B**) downregulation activities observed for multiple clones ( $N \geq 5$ ) isolated from baseline samples in AC patients. The dashed line (----) indicates wild type Nef function (set as 1.0), calculated using positive control Nef<sub>SF2</sub>. Solid bars and whiskers represent median and inter-quartile range, respectively.

**Figure S3: Correlations analyses in Acute Controllers and Acute Progressors.**

Nonparametric Spearman tests were used to conduct pair-wise analyses between clinical markers of HIV-1 infection and *in vitro* Nef functions at the baseline timepoint in Acute Controllers (AC) (**Panels A, B, C**) or Acute Progressors (AP) (**Panels D, E, F**). Significant correlations were observed between plasma viral load (pVL) and estimated days postinfection (eDPI) in both cohorts (**A, D**), between Nef-mediated HLA class I downregulation and eDPI in AC (**B**), and between pVL and Nef-mediated infectivity enhancement in AP (**F**).

Figure S1

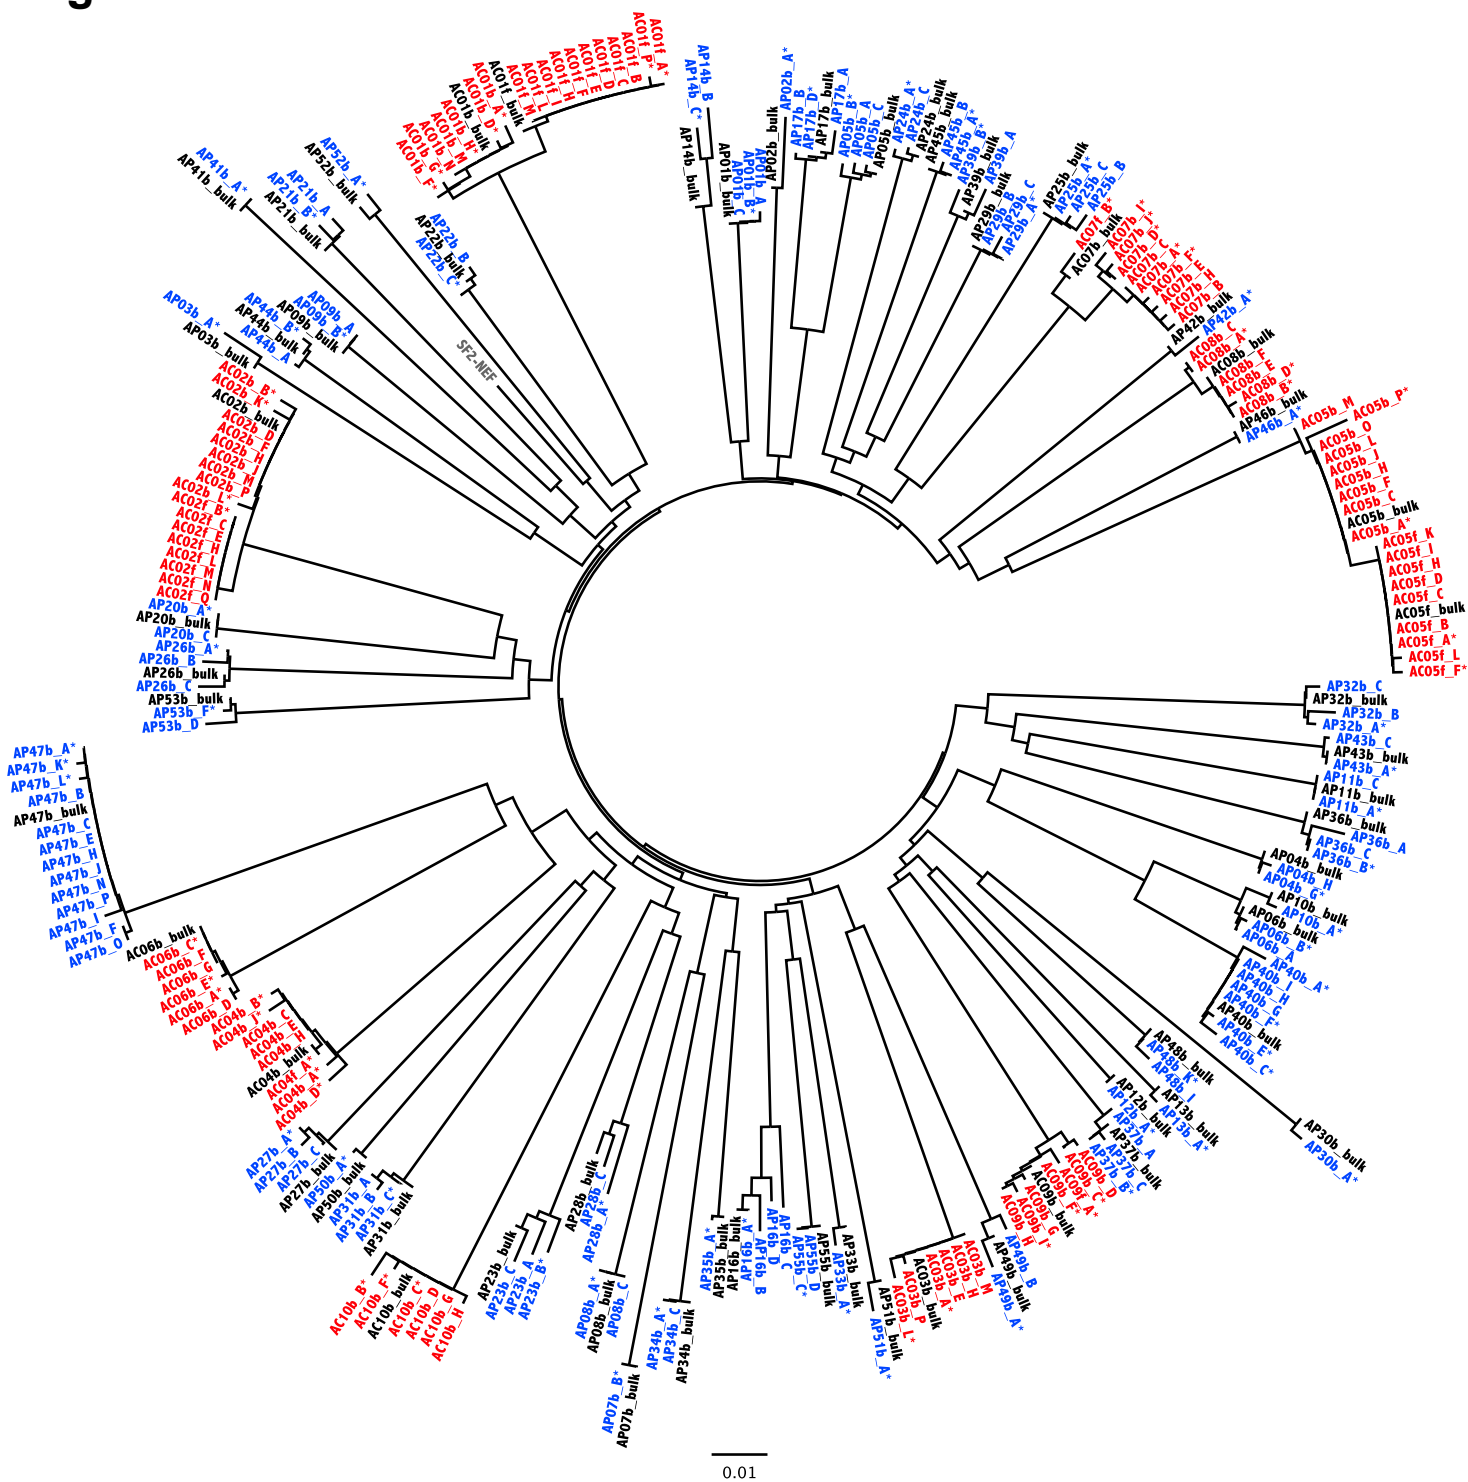

Figure S2

A.

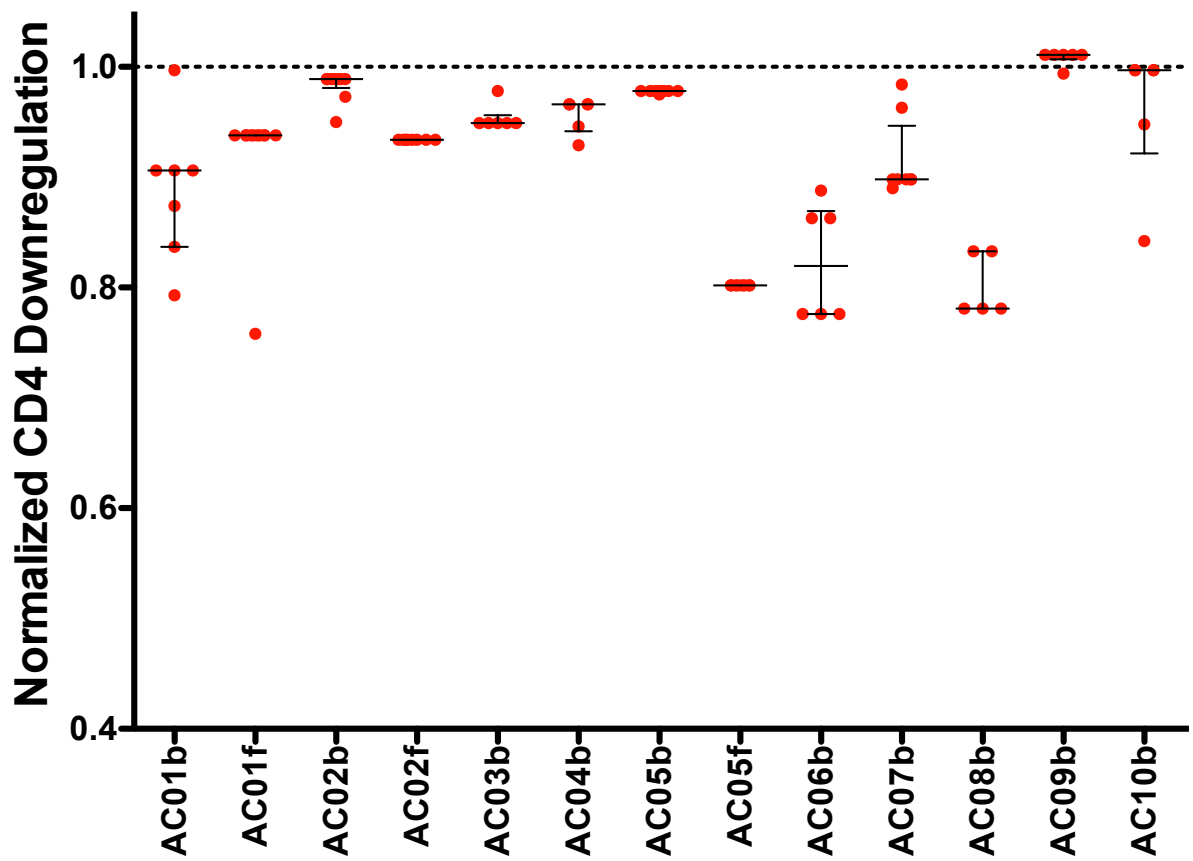

B.

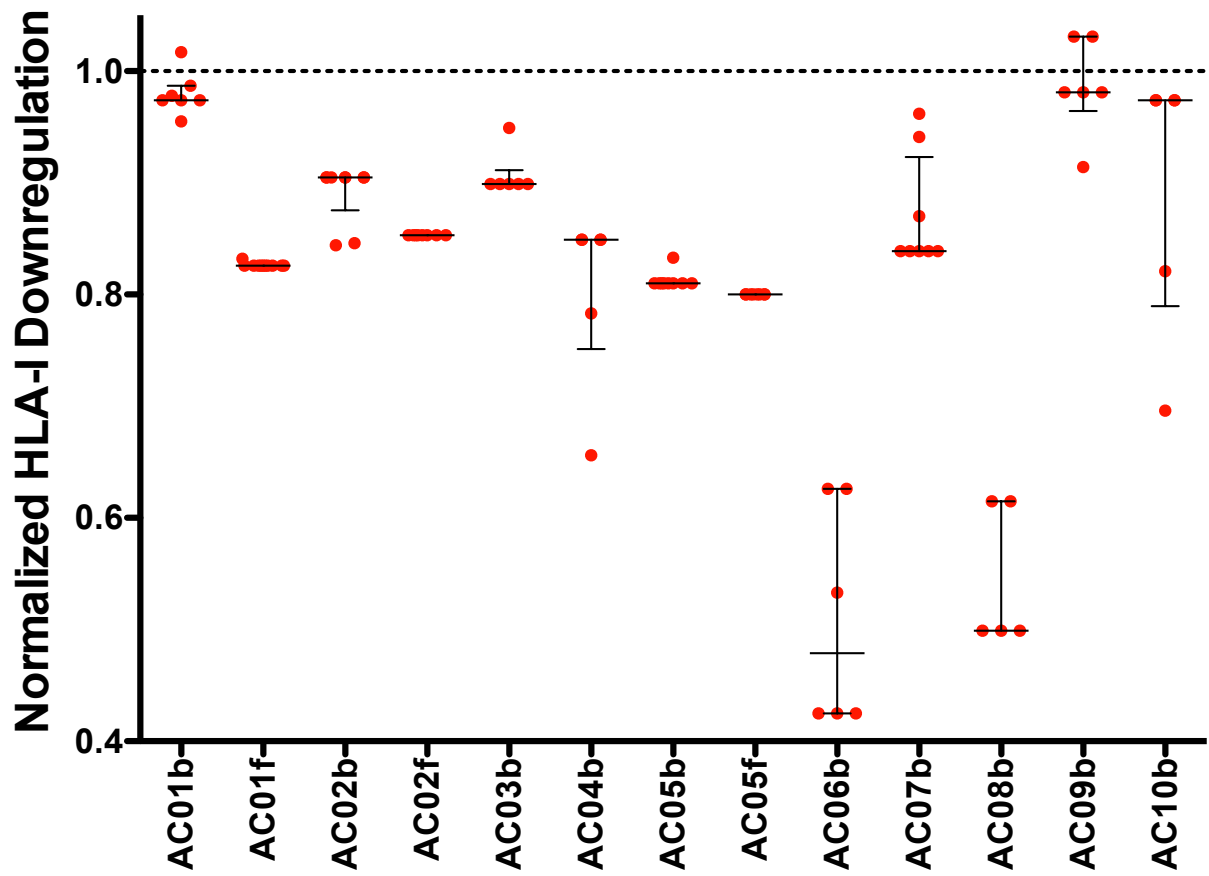

**Figure S3**

**Acute Controllers (N=10)**

**Acute Progressors (N=50)**

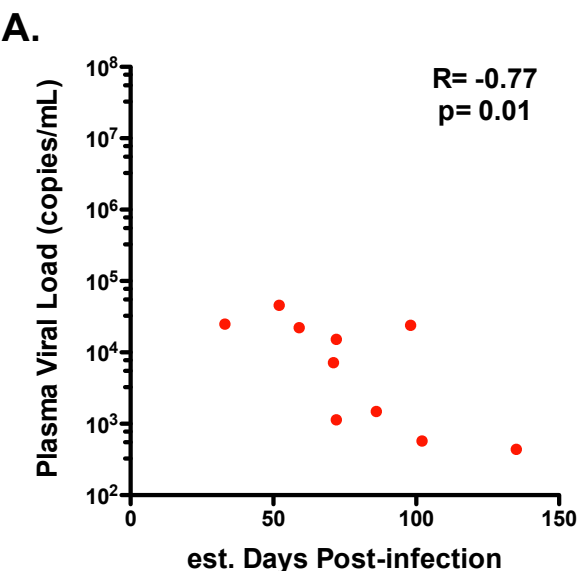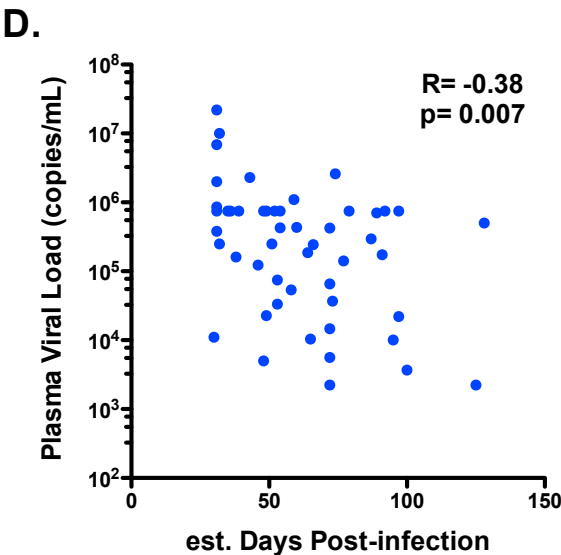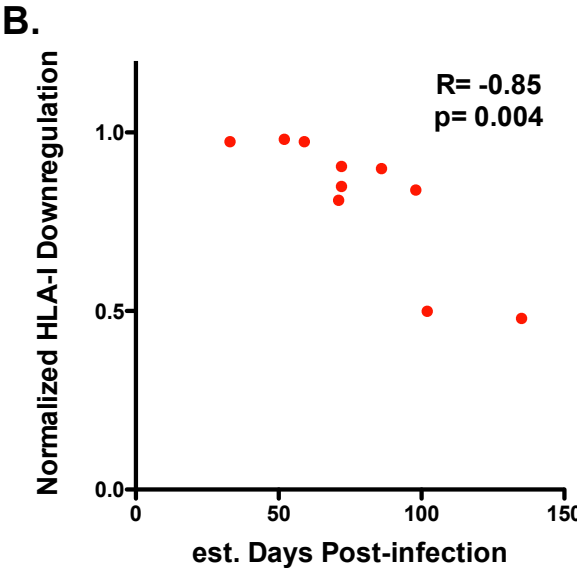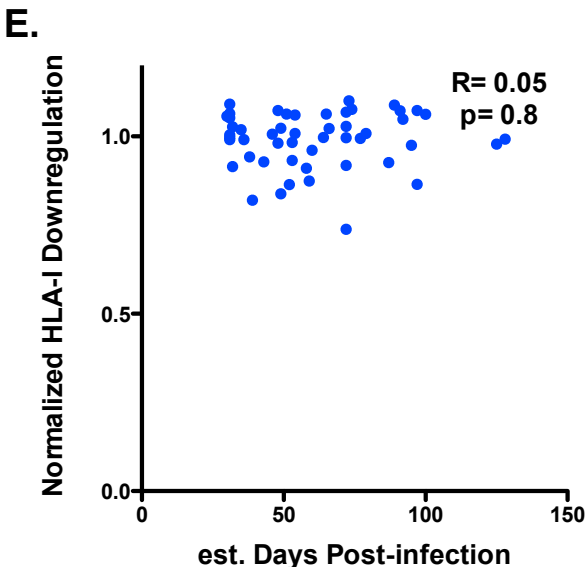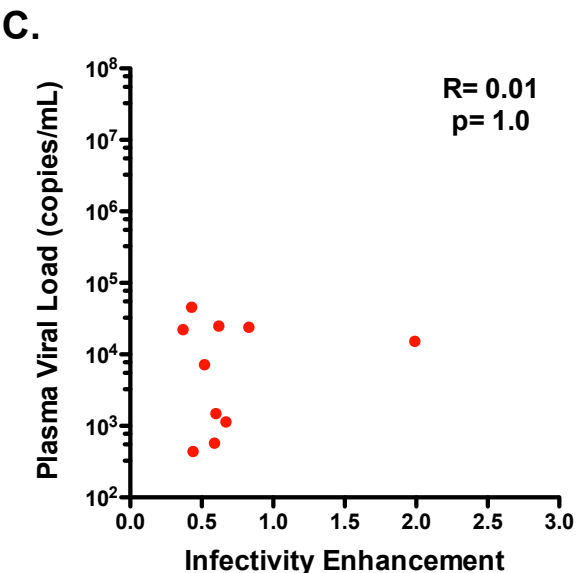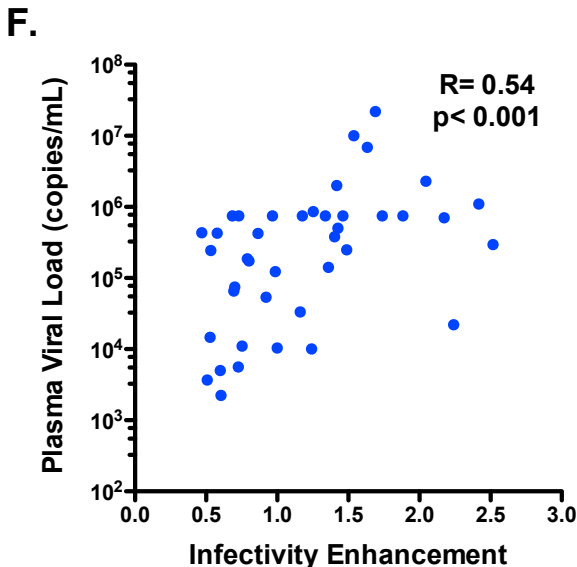

Supplement: JVI.01334-14_zjv999099457so1.pdf [file JVI.01334-14_zjv999099457so1.pdf]
